# Supplementary material
Source: Springer Nature journal article supplement (https://www.springermedizin.de/resource/supplementary/13054_2010_8526_MOESM3_ESM.pdf/9732162)

**A**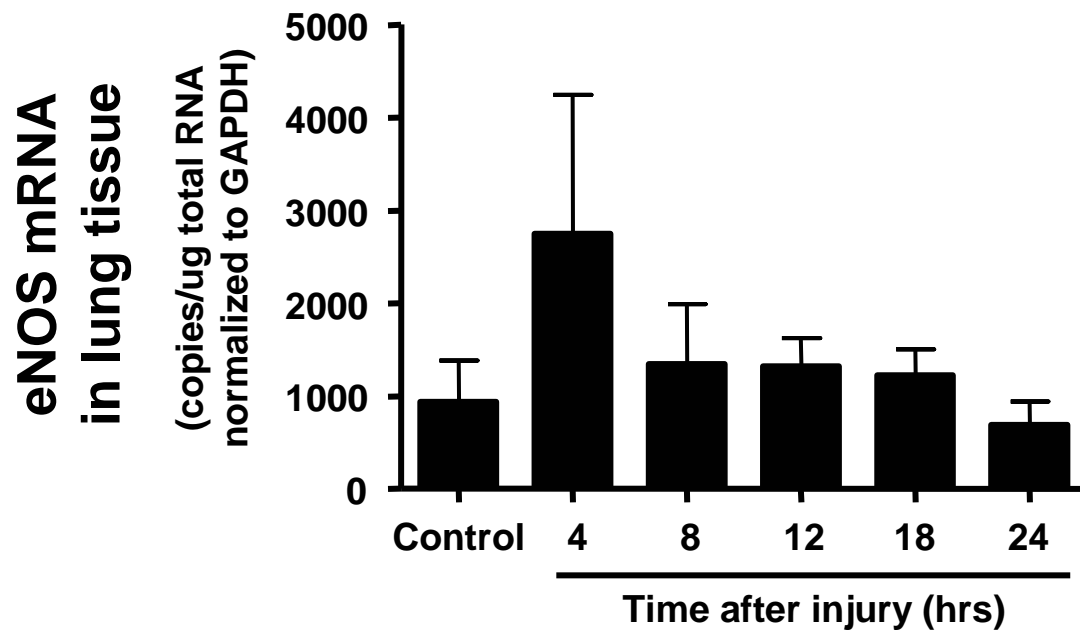**B**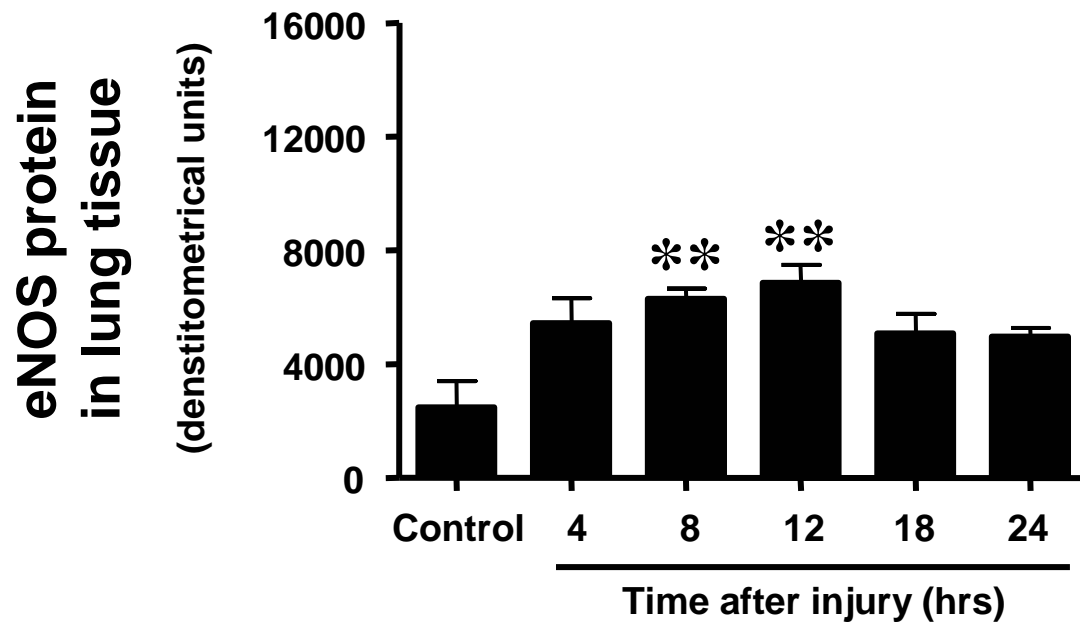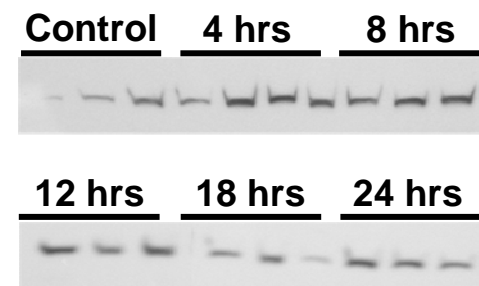

Supplement: MOESM3 [file 9732162]
